# Supplementary material for: Optimized synthesis of suvorexant and determination of eight residual solvents by headspace gas chromatography
Source: Royal Society of Chemistry journal article supplement (doi:10.1039/d5ra06779k), 2025-01-01

**supplement data**

# Other Synthetic Route

| Synthetic Method | Key Features                                                 | Overall Yield & Largest Scale                                                                                      | Synthetic Steps (vs This Work) | AE (%)   |
|------------------|--------------------------------------------------------------|--------------------------------------------------------------------------------------------------------------------|--------------------------------|----------|
|                  |                                                              |                                                                                                                    |                                |          |
|                  | Chiral Column Separation and Resolution Method (Merck & Co.) | Chiral HPLC separation is required; it is suitable for laboratory use but not compatible with industrial scale-up. | 11.00% & 200g                  | 9/8 52.2 |

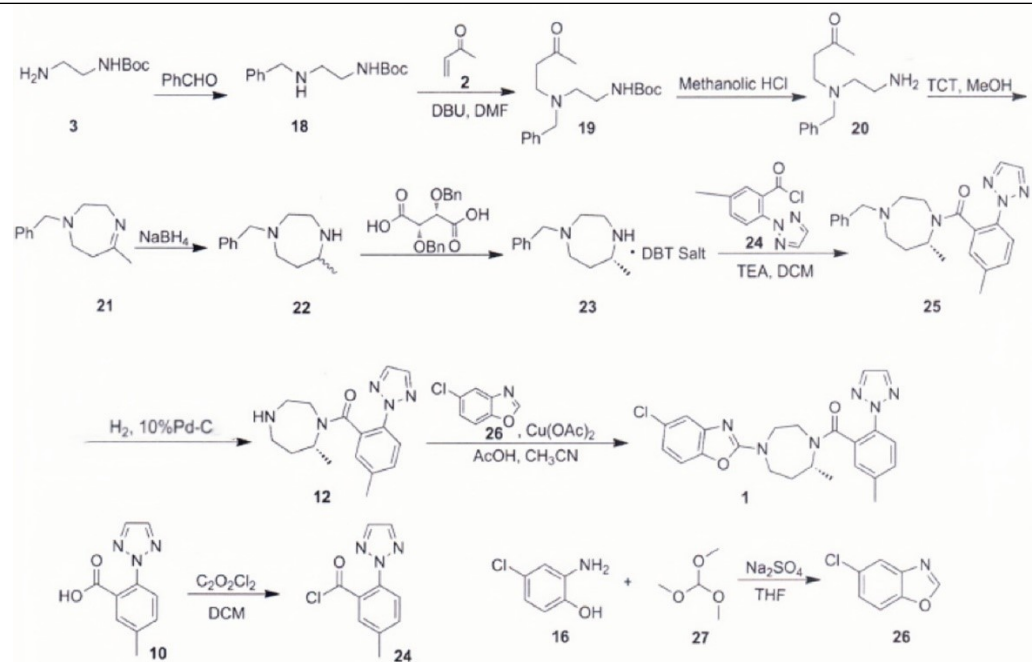

Chiral Column  
Separation and  
Resolution  
Method (Reddy's)

The  
protecting  
group was  
changed,  
but  
resolution  
is still  
required.

4.95%  
&  
250g

9/8

60.3

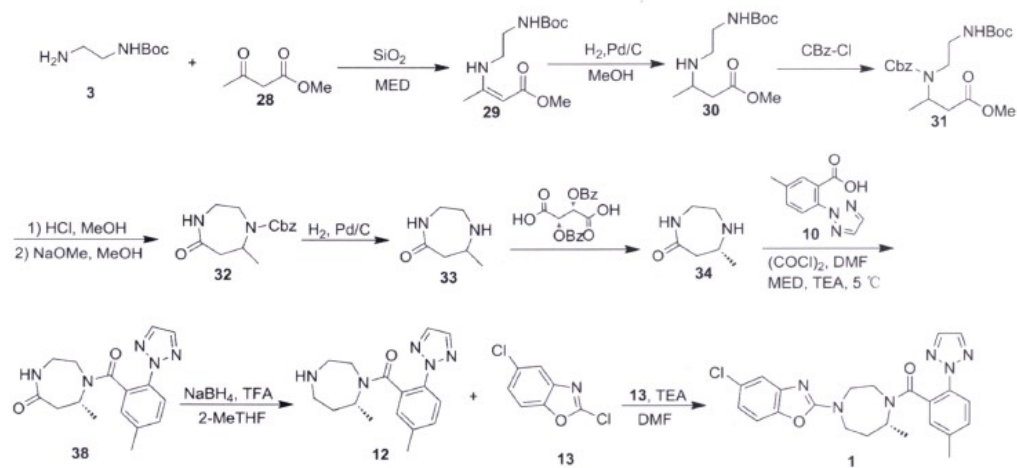

Chiral Column  
Separation and  
Resolution  
Method(Sandoz)

Protecting  
groups are  
used  
frequently,  
and the  
resolution  
yield is  
low.

<10.00%  
&  
5g

9/8

45.2

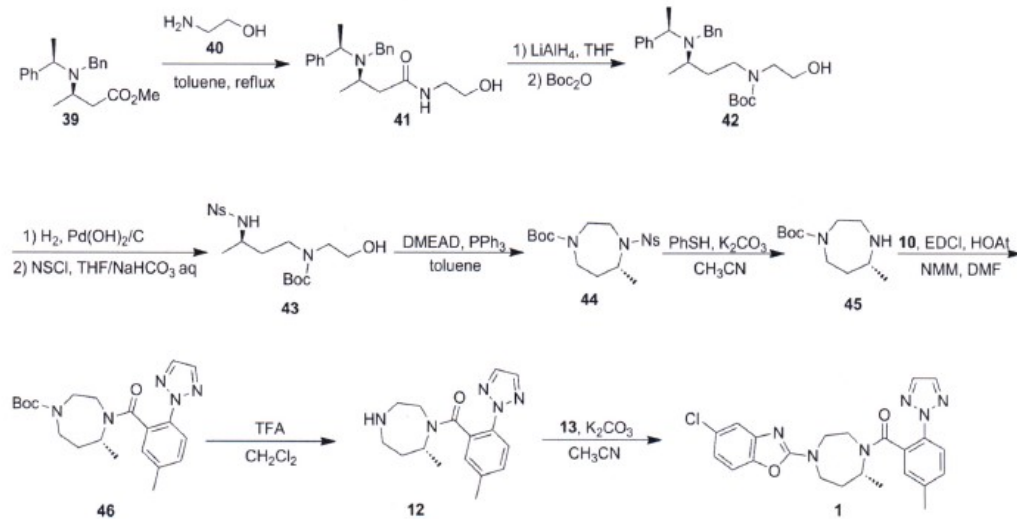

Chiral Starting  
Material Method  
(University of Toyama)

The  
number of  
protecting  
groups  
used is  
relatively  
large, and  
the raw  
materials  
need to be  
customized

30.65%  
&  
10g

8/8

50.7

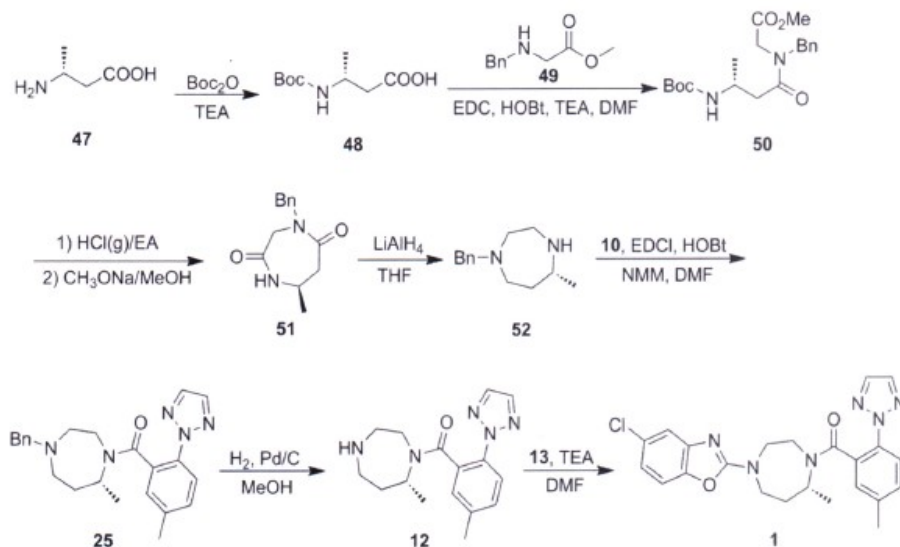

Chiral Starting  
Material Method  
(MINEHIRA D)

The enantiomeric excess (e.e.%) is greater than 99%, the yield of each step is high, and the process is industrially friendly.

56.00%  
&  
15g

7/8

56.6

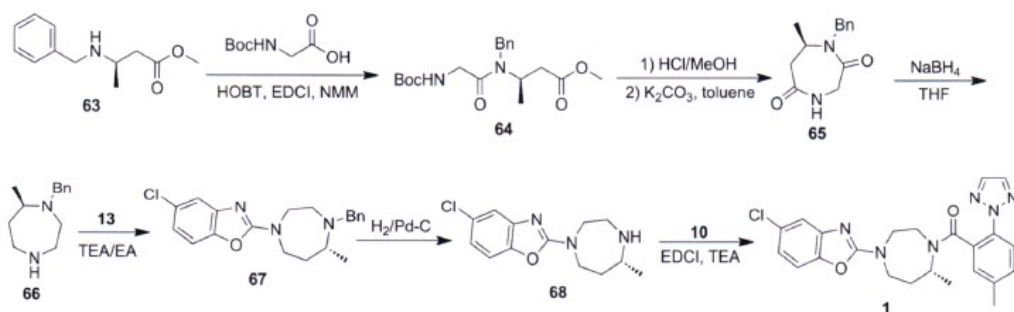

Chiral Starting  
Material Method  
(Shanghai Institute of  
Technology)

The yield is the highest, and the route is concise.

60.00%  
&  
5g

6/8

58.2

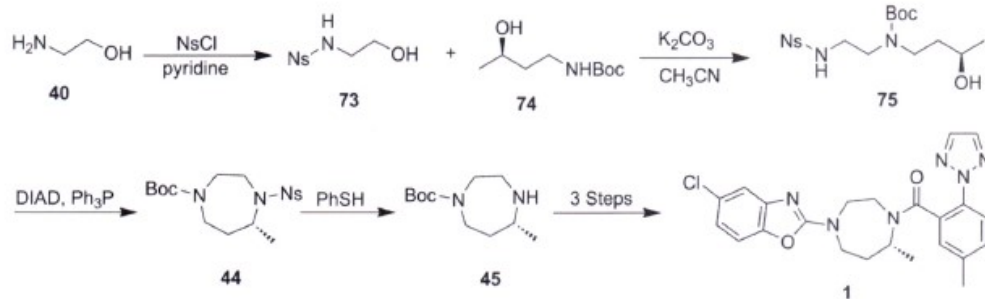

Chiral Starting  
Material Method  
(Ye Haiwei et al.)

The yield  
of the four-  
step  
reaction is  
57.00%,  
and the  
overall  
yield is  
high.

40.50%  
&  
15g

5/8

66.8

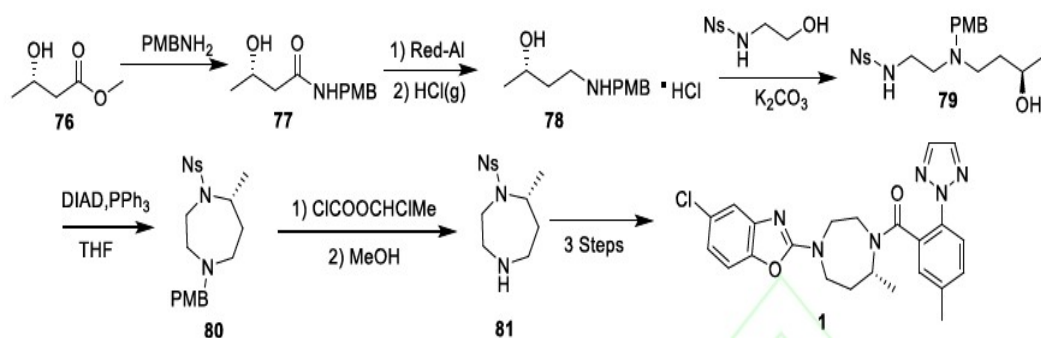

Chiral Starting  
Material Method  
(Translated by Qiu Kang et  
al.)

The post-  
treatment  
of the  
cyclization  
step is  
difficult.

7.50%  
&  
5g

6/8

50.2

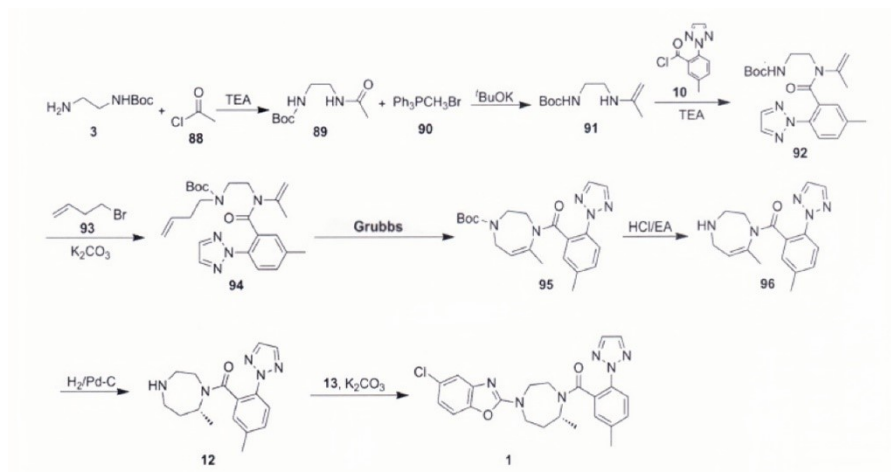

Grubbs Catalyst  
Method (Translated by  
Li Qiang et al.)

The use of  
Grubbs  
ruthenium  
catalysts  
comes with  
the  
drawback  
of high  
cost.

18.40%  
&  
20g

9/8

51.3

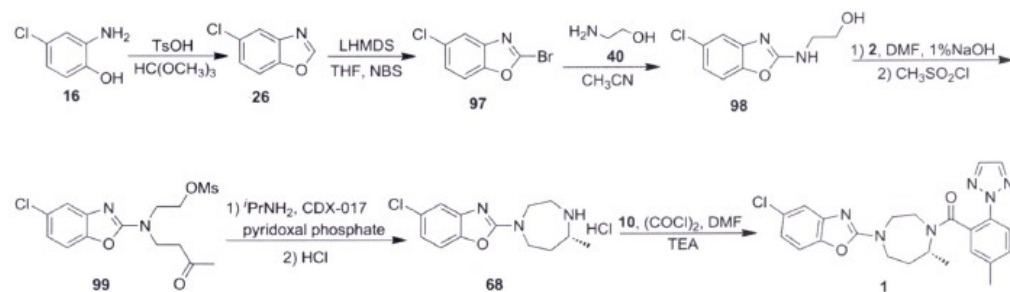

Biocatalytic  
Enzyme Method  
(Merck)

It avoids  
the use of  
halogenate  
d solvents  
and heavy  
metals, but  
the enzyme  
catalyst is  
expensive.

43.00%  
&  
25g

6/8

61.2





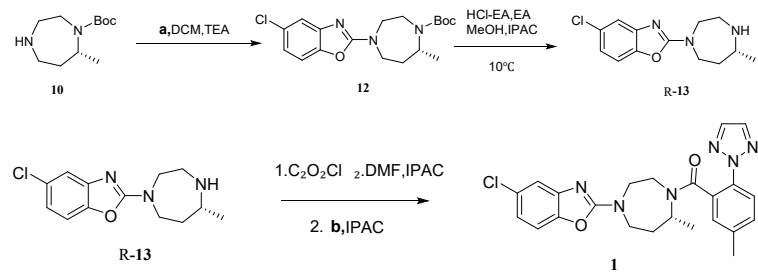

Supplement: d5ra06779k2.pdf [file d5ra06779k2.pdf]
